# Supplementary material for: Broadly resistant HIV-1 against CD4-binding site neutralizing antibodies
Source: PubMed Central journal article supplement (PMC6592578; doi:10.1371/journal.ppat.1007819), 2019-06-13

A

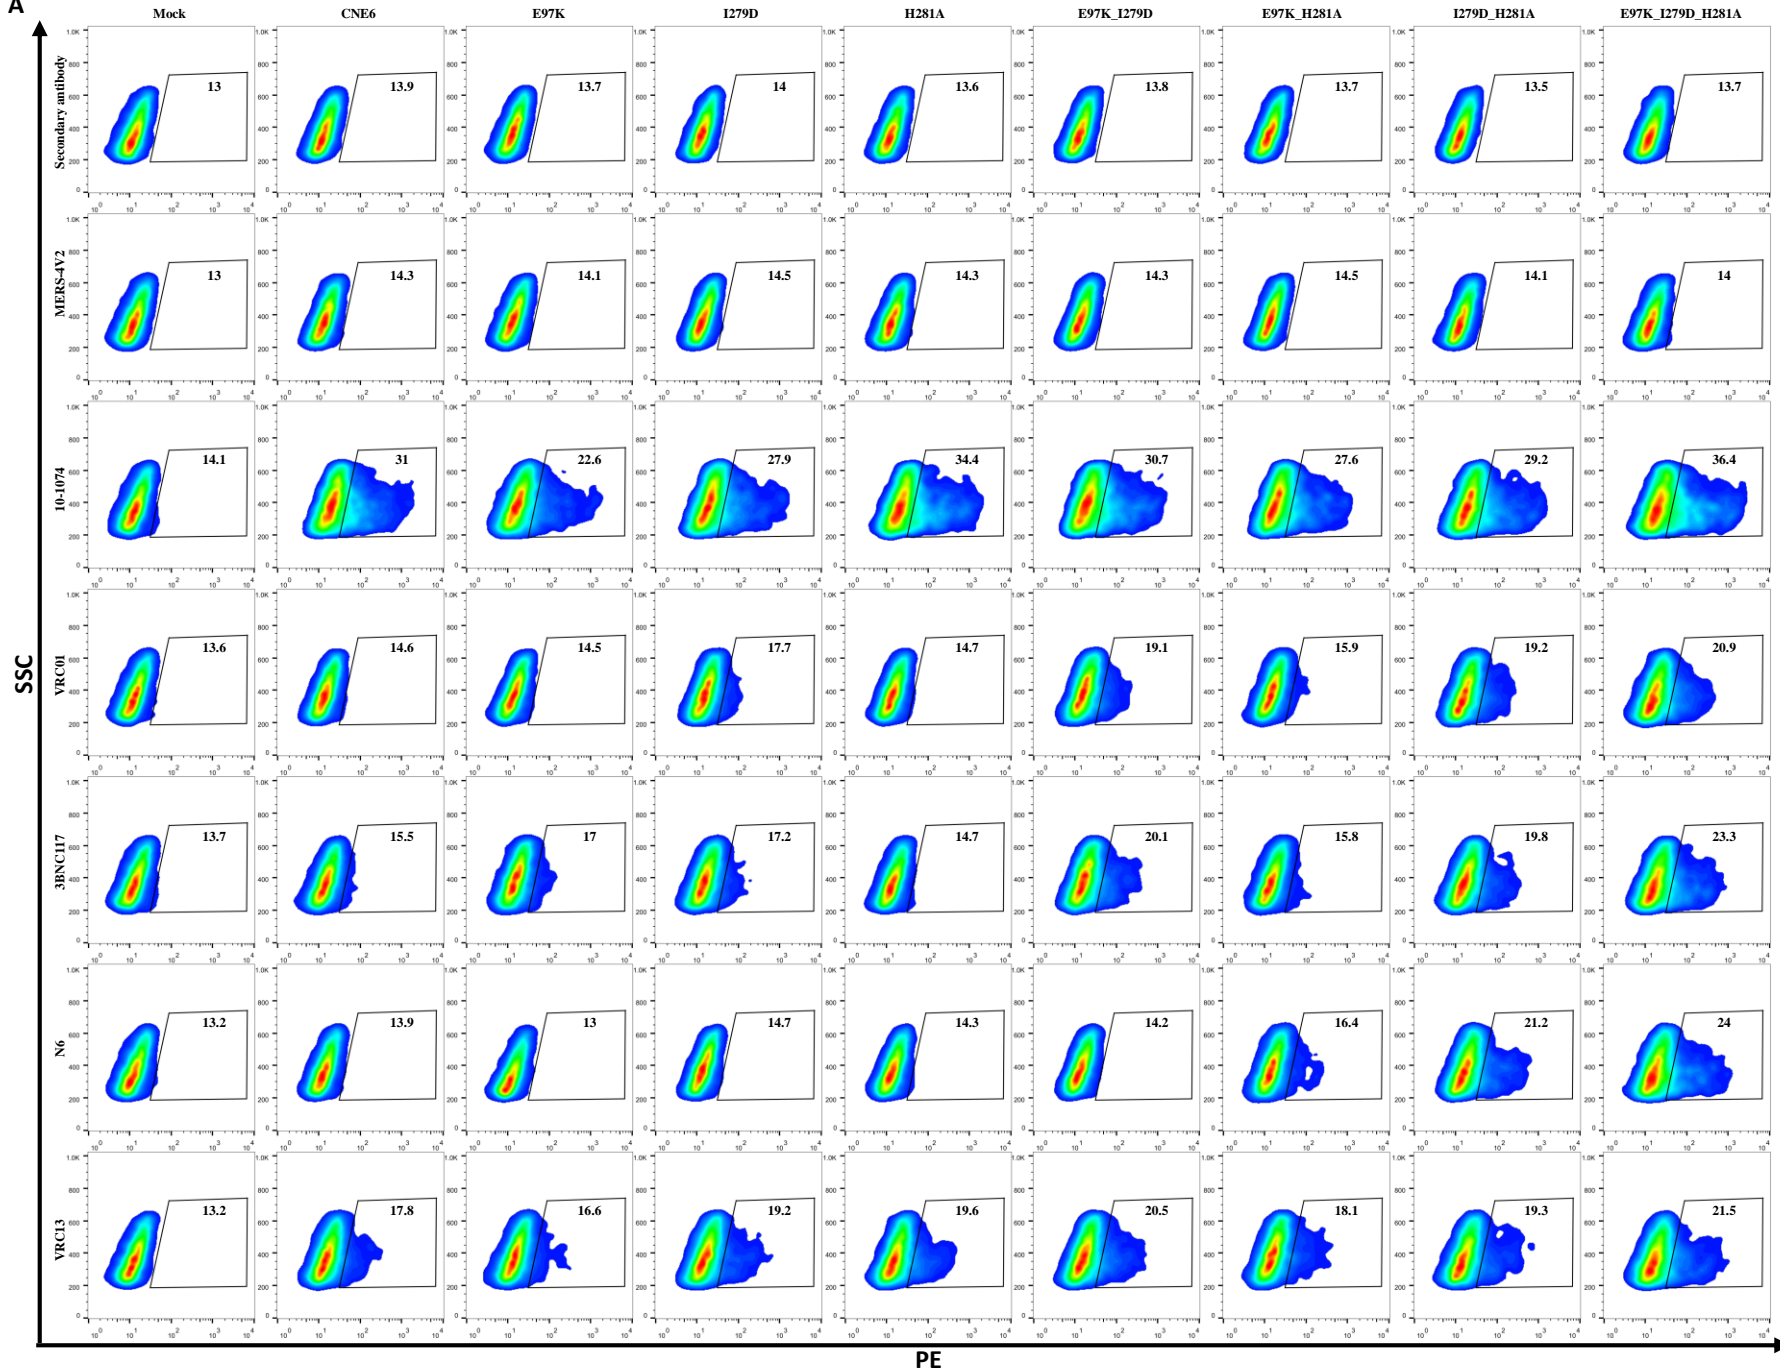

PE

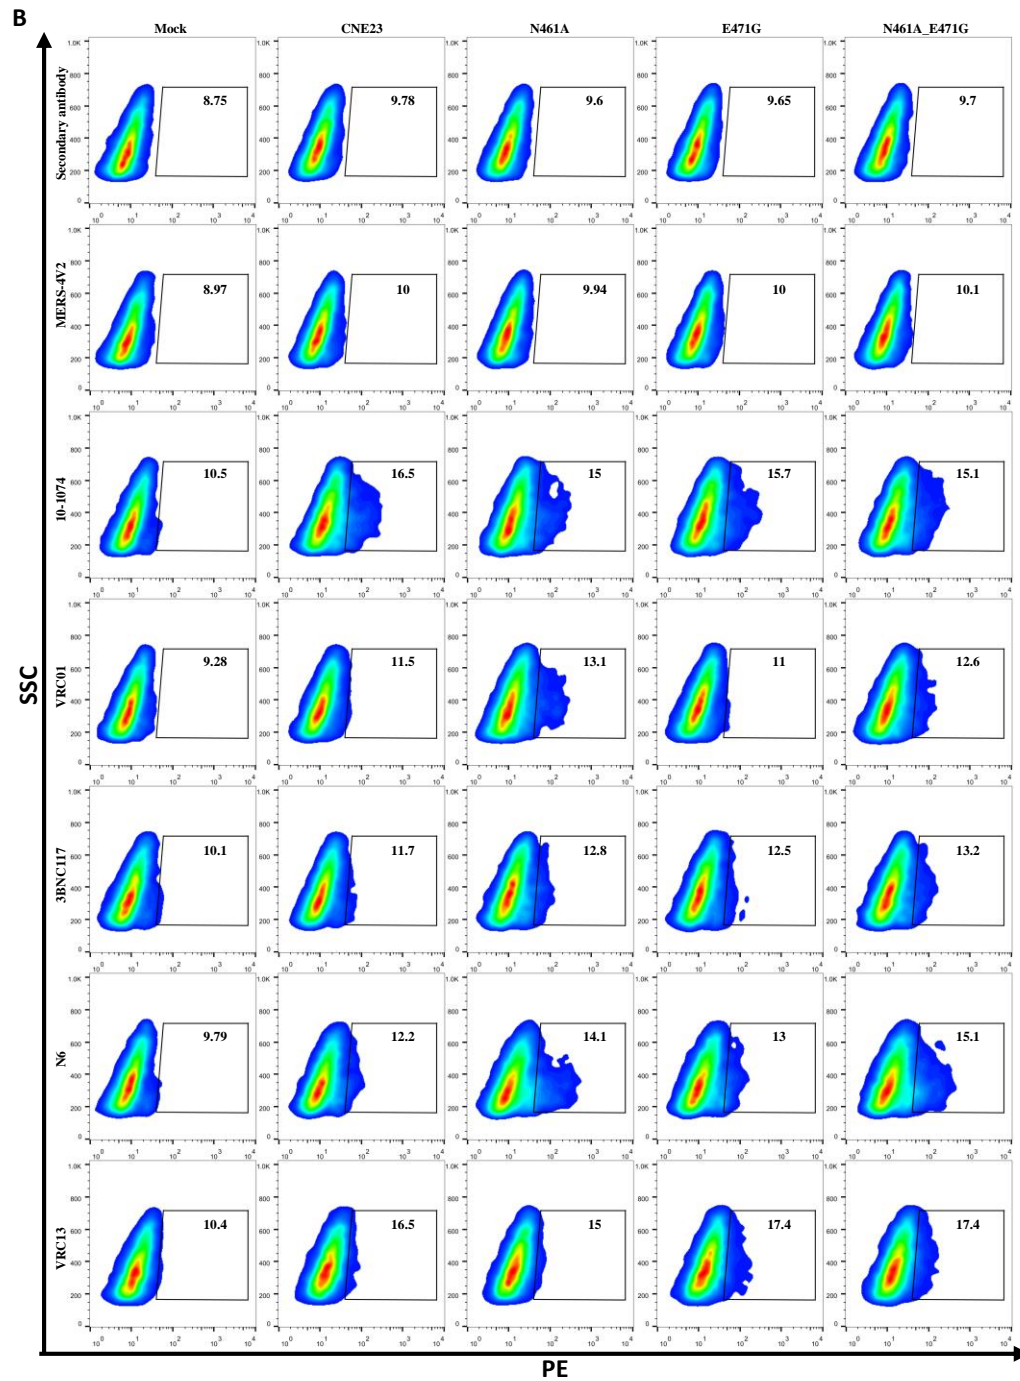

C

SSC

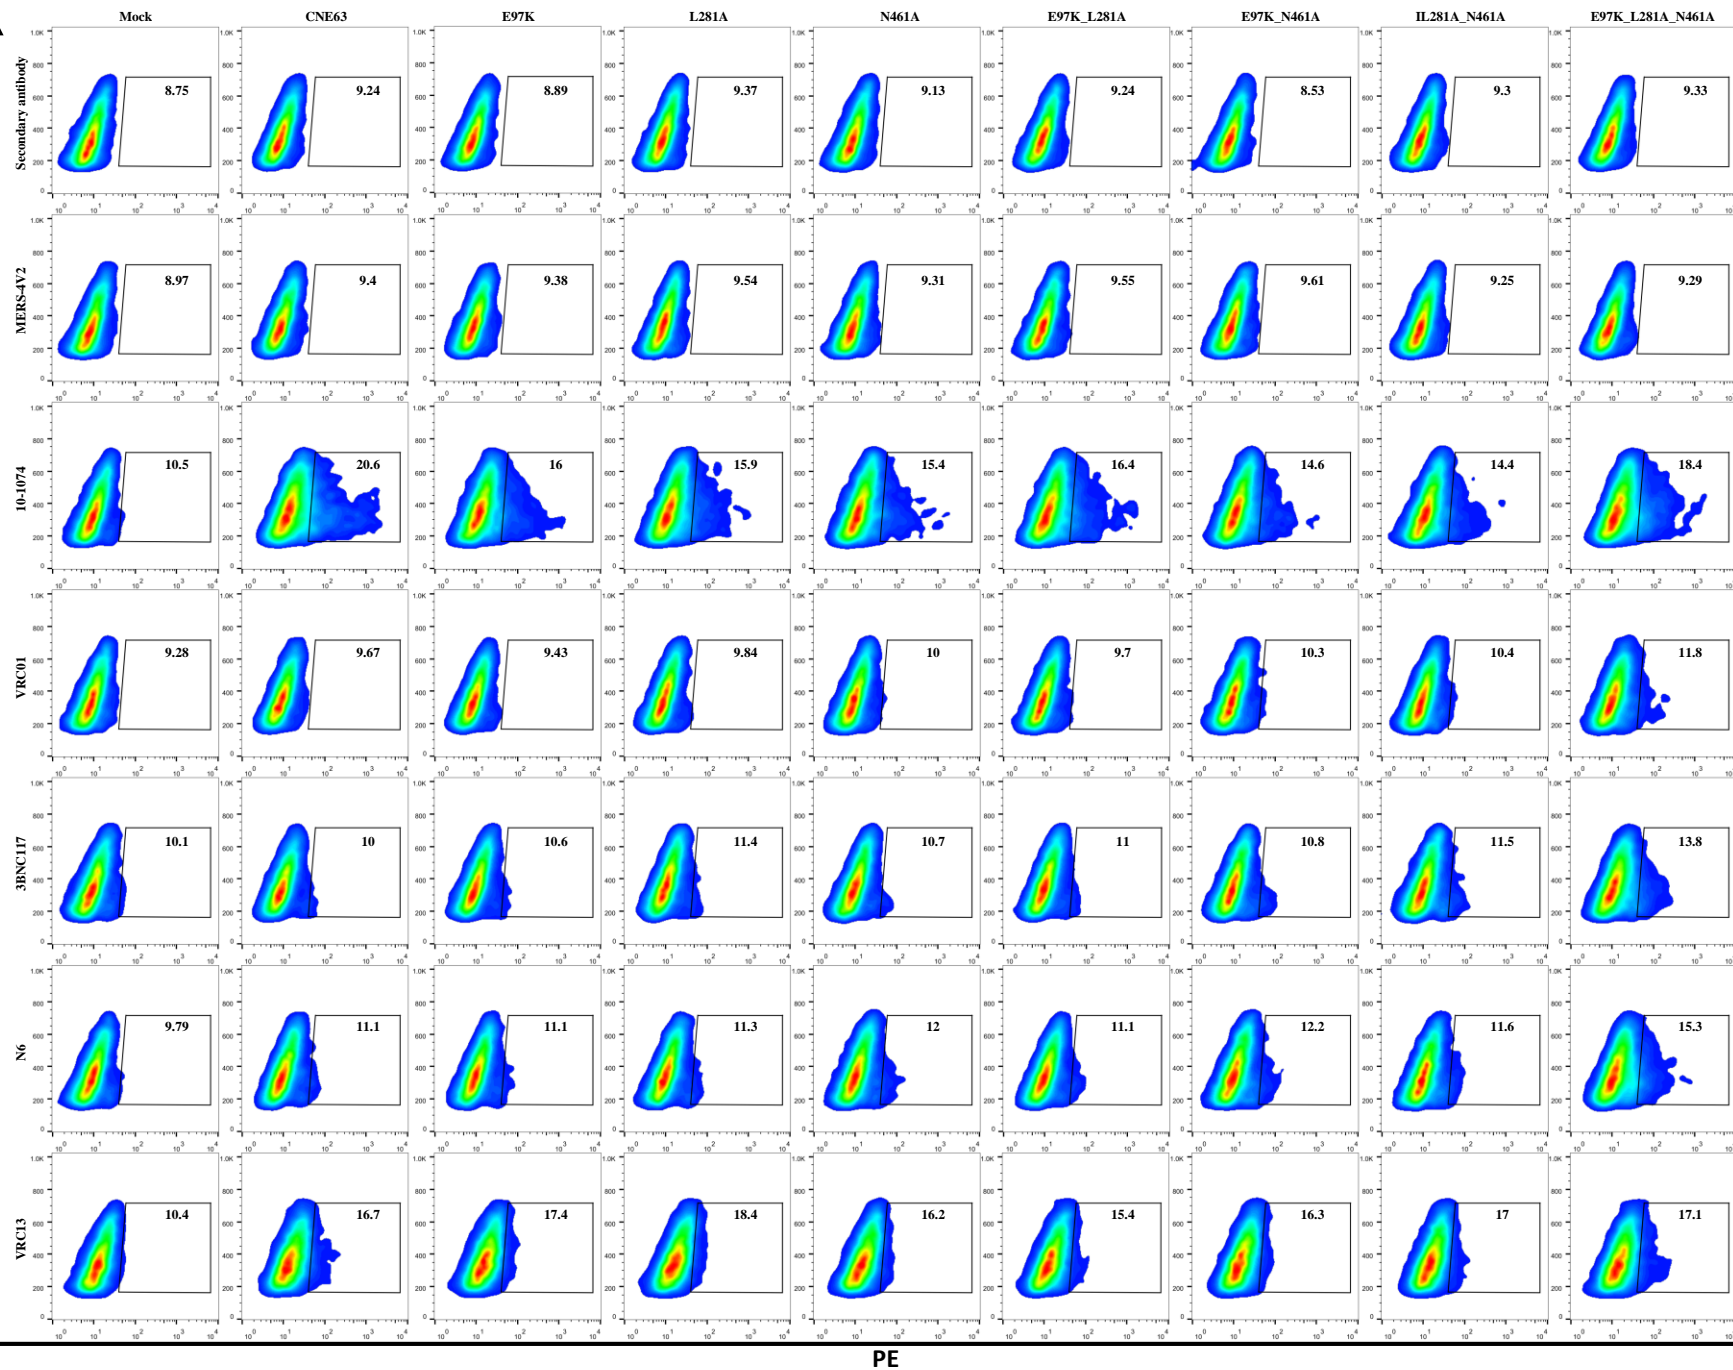



**D**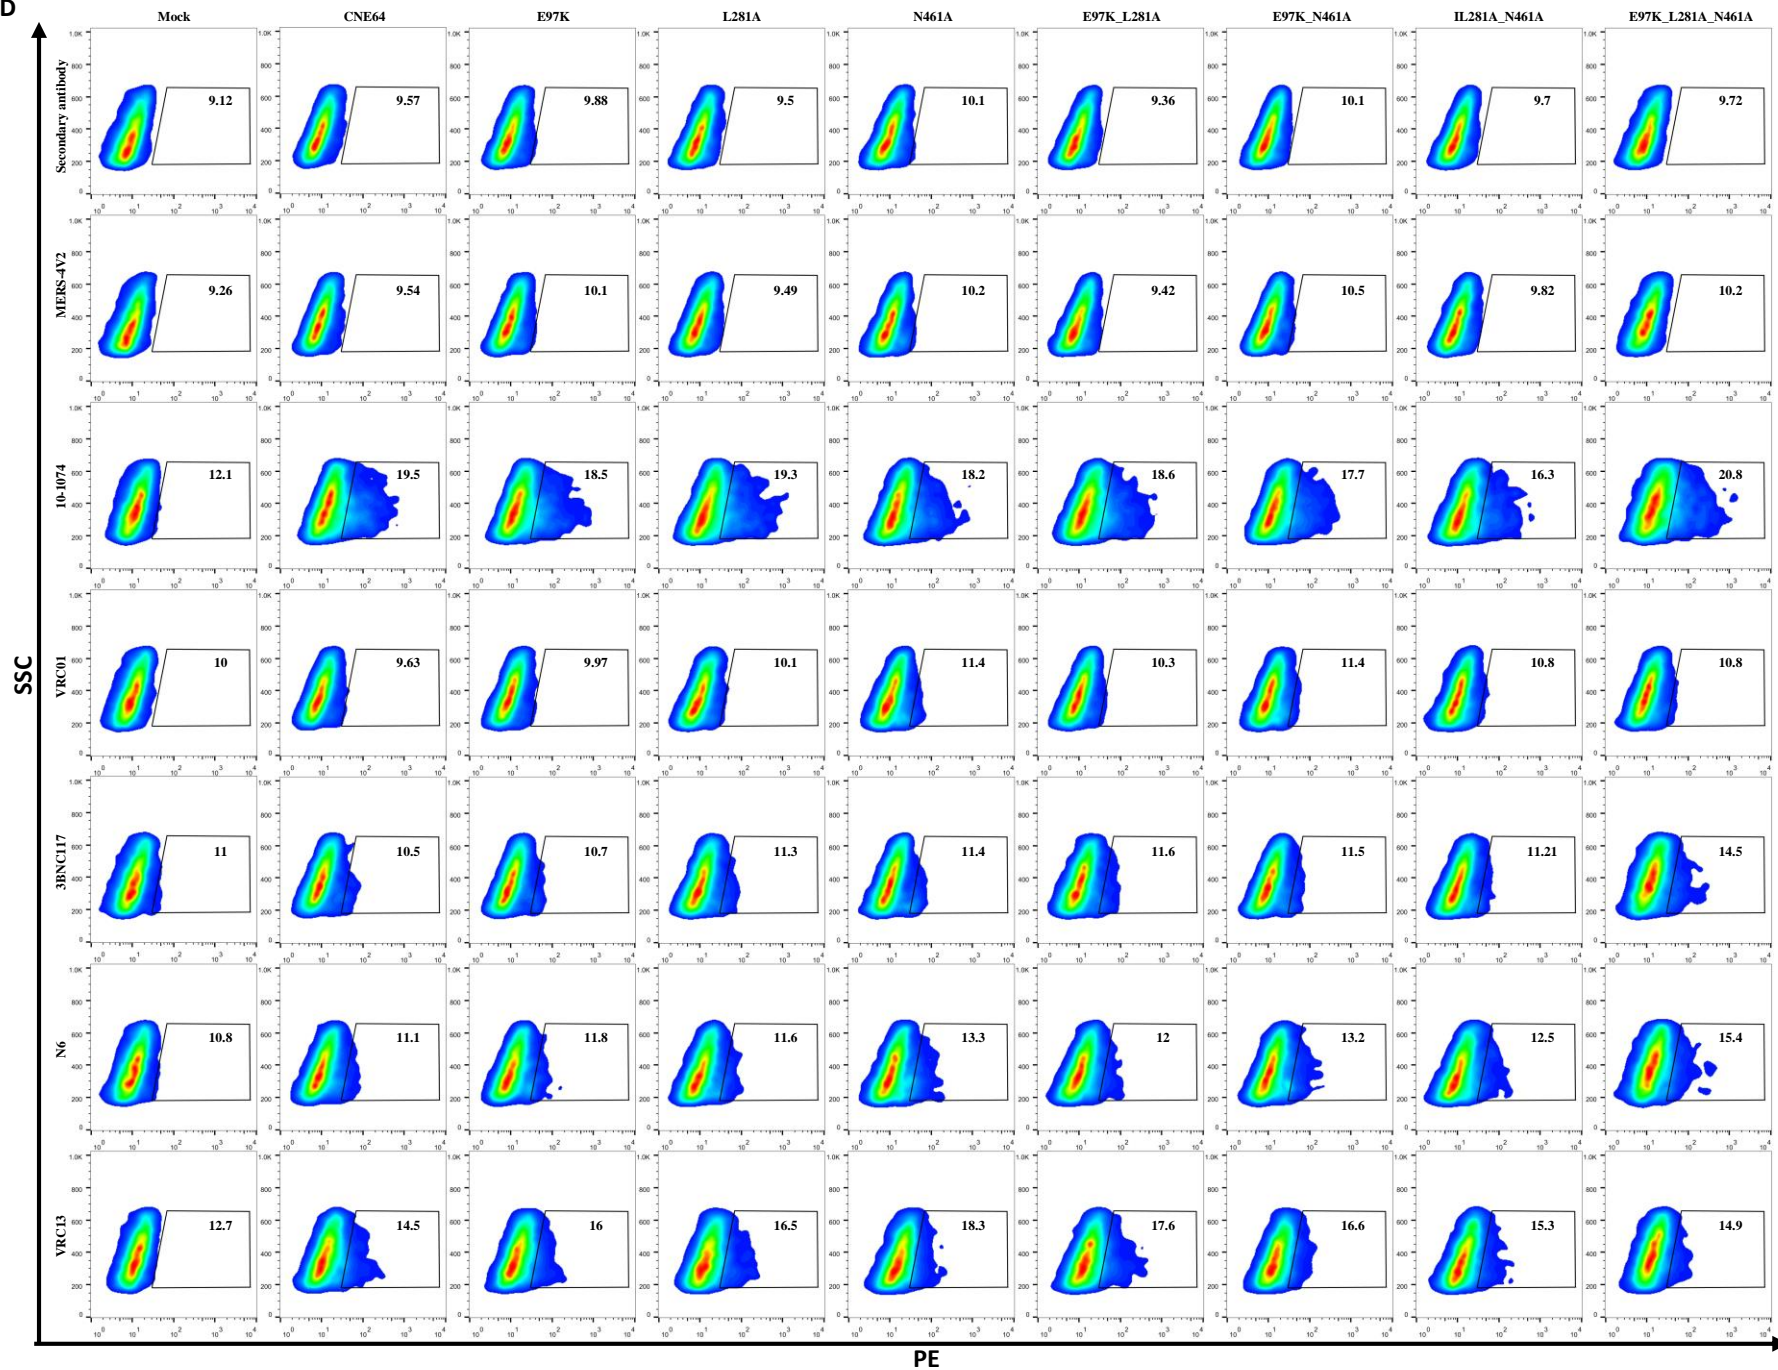

E

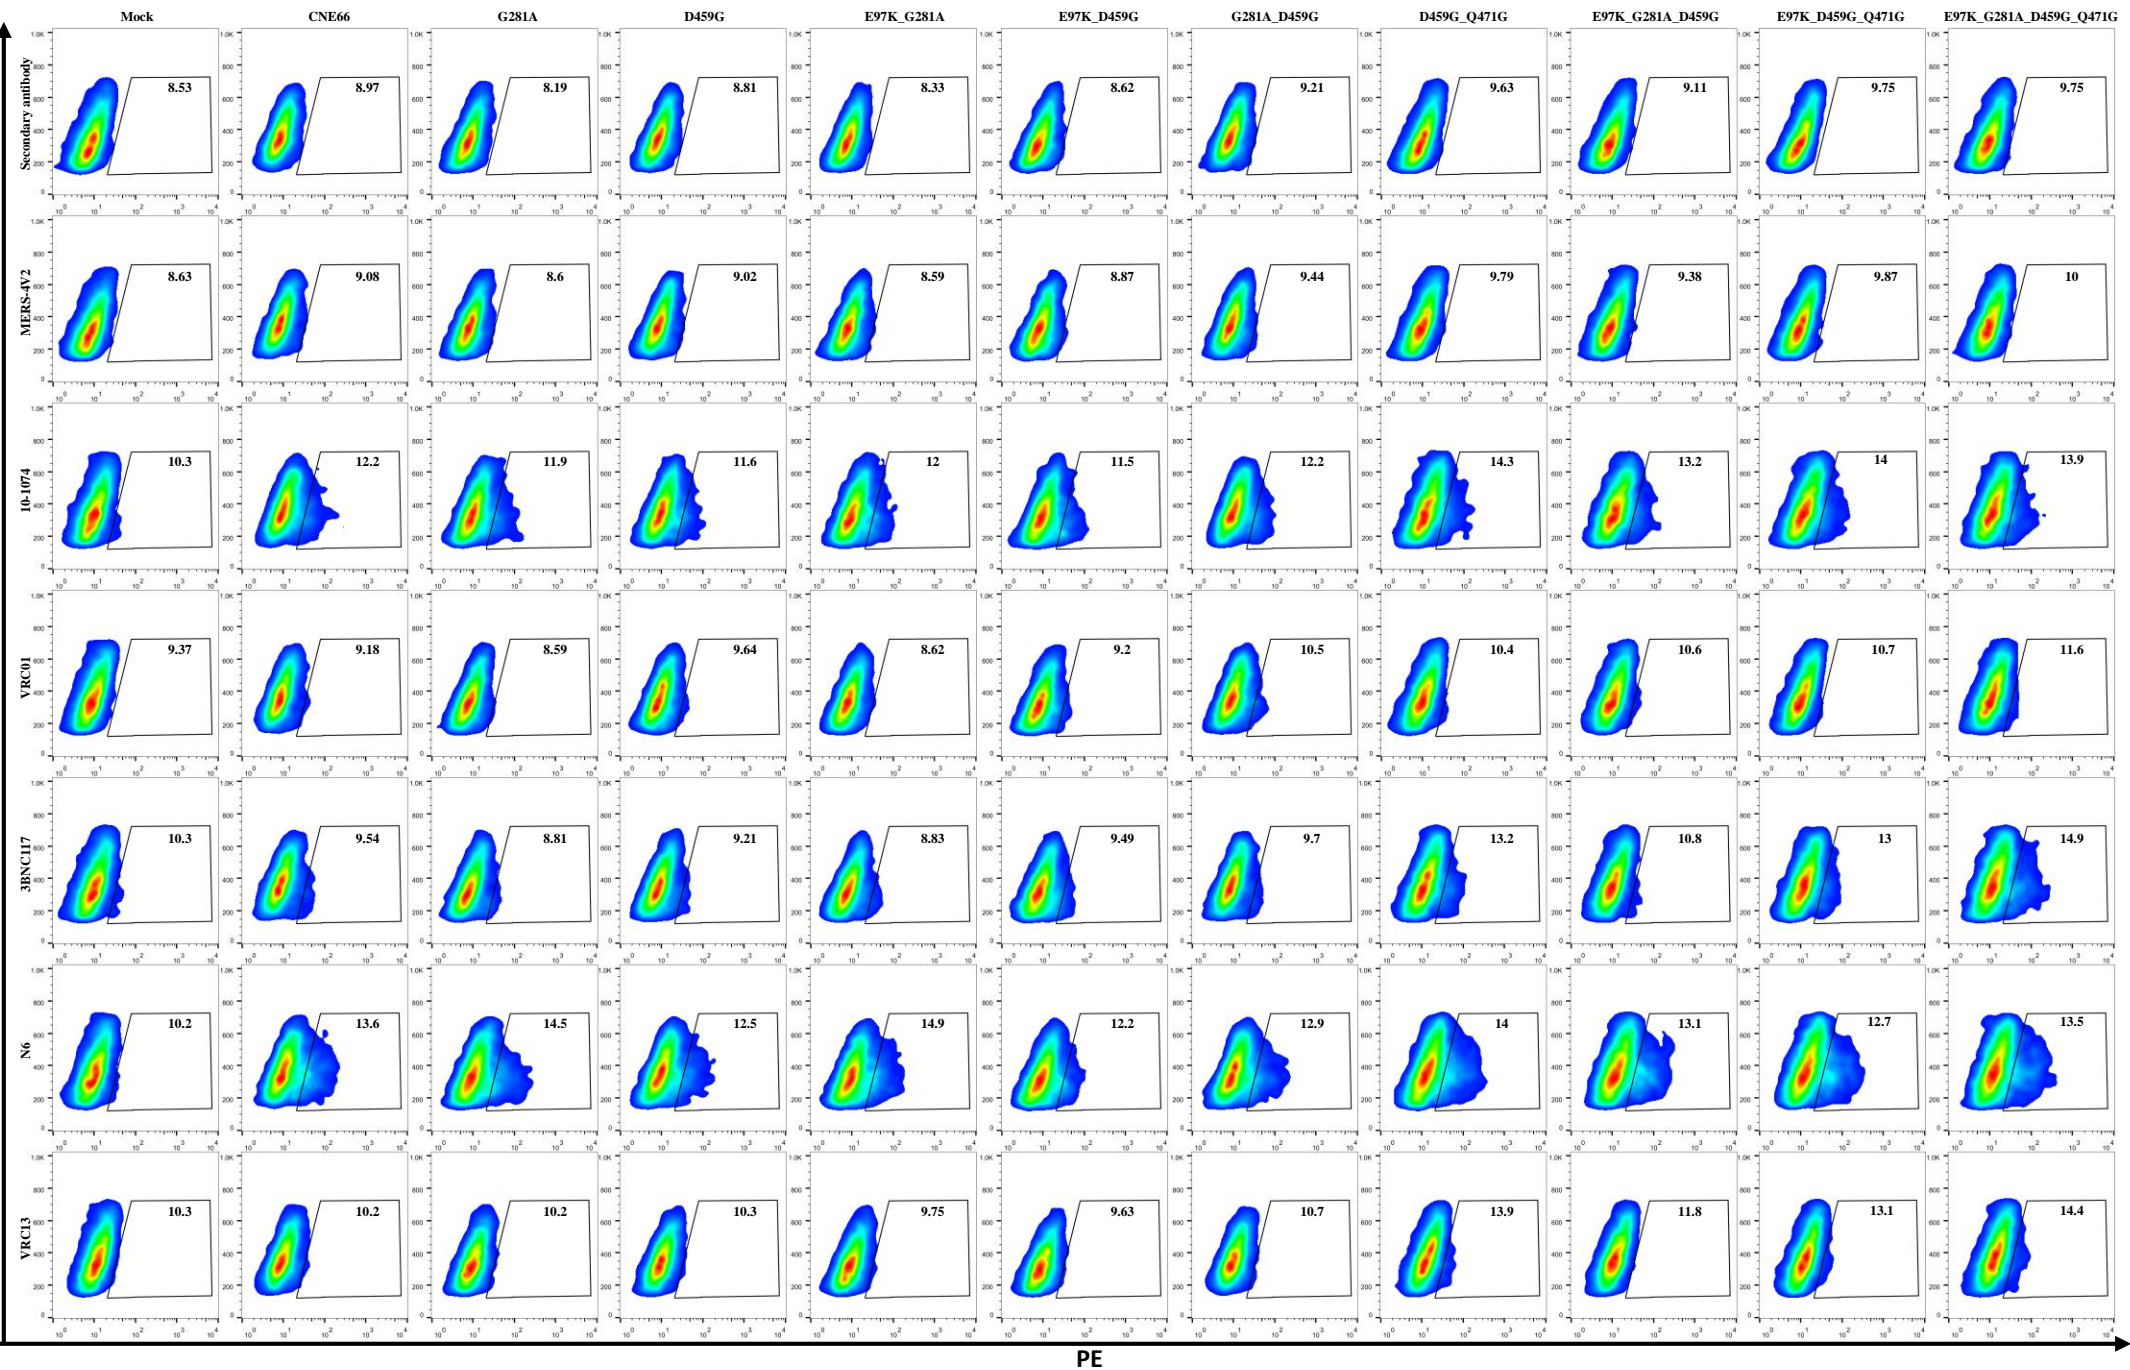

PE



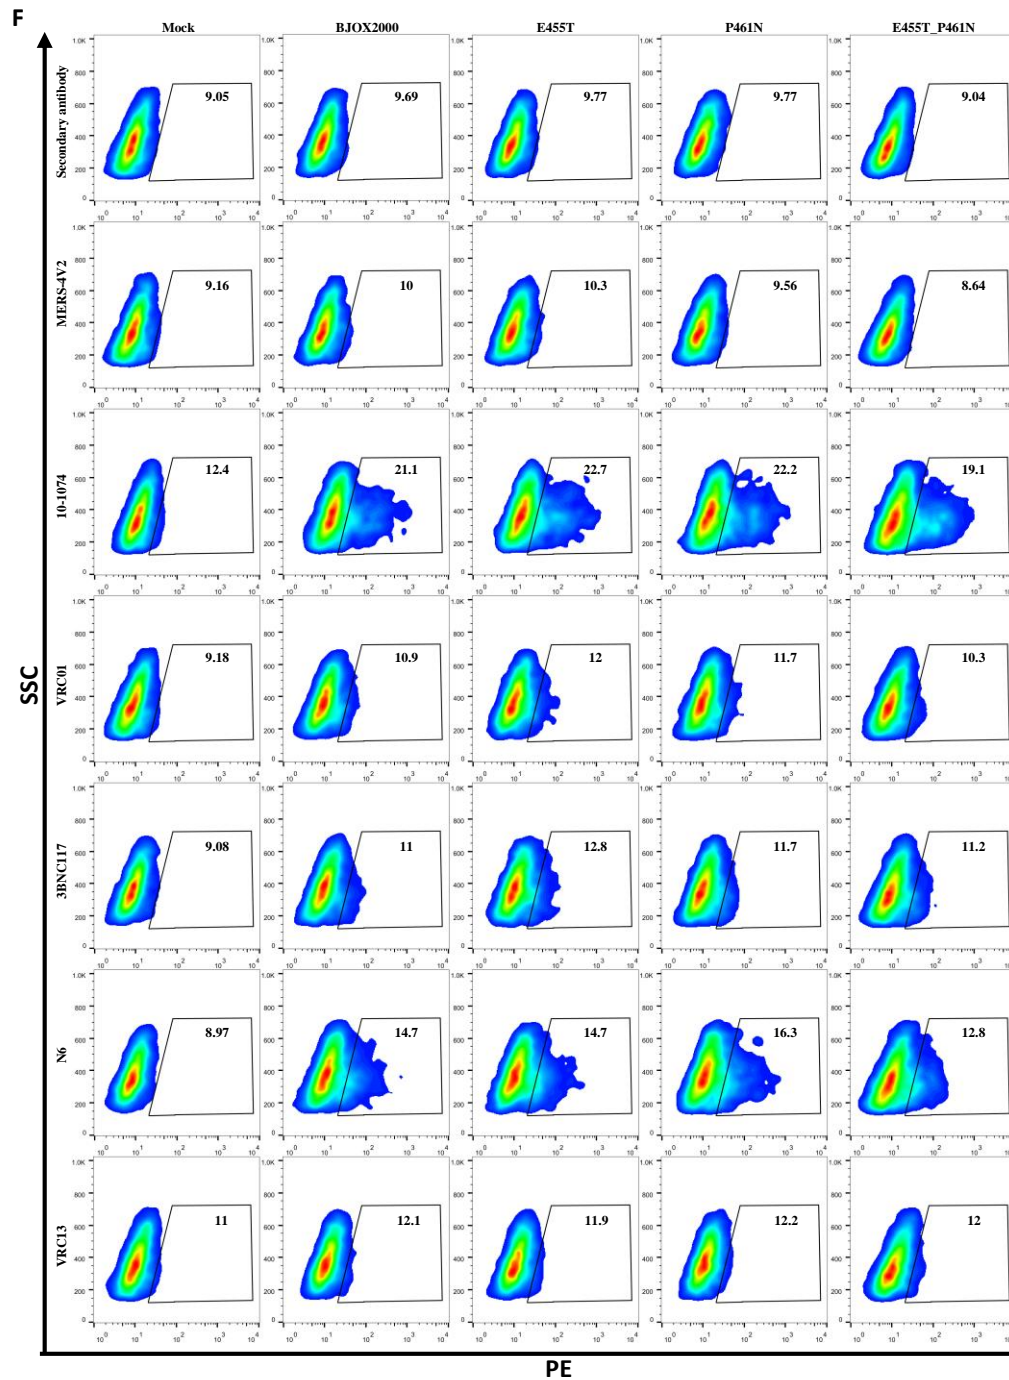

Supplement: ppat.1007819.s001.pdf [file ppat.1007819.s001.pdf]
